# Supplementary material for: Single-step label-free hepatitis B virus detection by a piezoelectric biosensor
Source: Royal Society of Chemistry journal article supplement (doi:10.1039/c5ra03467a), 2015-01-01
Supplement: c5ra03467a1.pdf [file c5ra03467a1.pdf]

## Supporting information:

### Single-Step Label Free Hepatitis B Virus Detection by Piezoelectric Biosensor

Nicoletta Giambianco<sup>\*a</sup>, Sabrina Conoci<sup>b</sup>, Dario Russo<sup>c</sup> and Giovanni Marletta<sup>a</sup>

<sup>a</sup> Laboratory for Molecular Surfaces and Nanotechnology (LAMSUN), Department of Chemical Sciences, University of Catania and CSGI, 95125 Catania, Italy.

<sup>b</sup> STMicroelectronics, Stradale Primosole 50, 95121 Catania, Italy.

<sup>c</sup> Clonit Srl, Via Bernardo Quaranta 57 20139 Milano MI, Italy

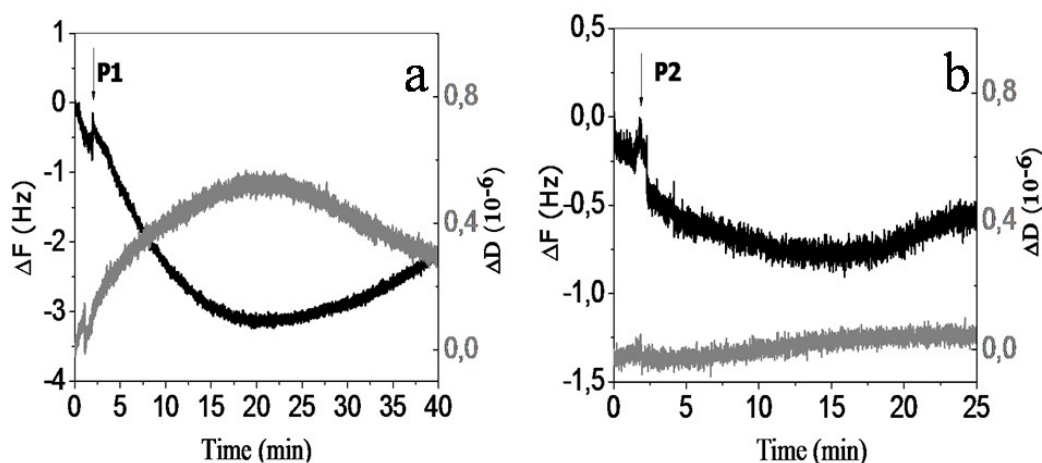

**Figure SI 1.** QCM-D frequency (black curves) and dissipation curves (grey curves) versus time of ssDNA probe (P1) (a) and P2 (b) assembled onto gold surface at concentration of 0.08  $\mu\text{M}$  and then rinsed with  $\text{H}_2\text{O}$ .

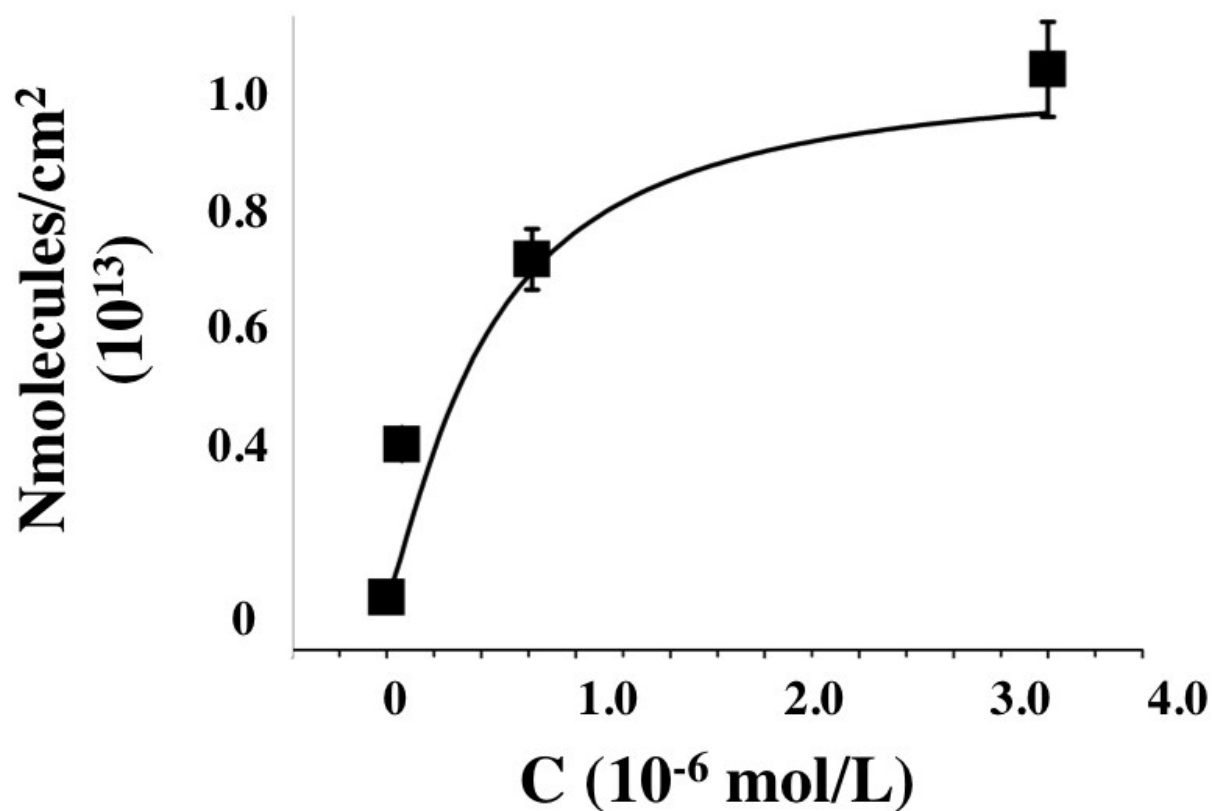

**Figure SI 2.** Surface coverage (N molecules/cm<sup>2</sup>) versus concentration (C) of ssDNA probe solution (P2). The isotherm was fitted by using a Langmuir adsorption model. Langmuir adsorption equilibrium coefficient (K) of 4.0x10<sup>5</sup> M<sup>-1</sup> was obtained from the fit. The Langmuir gave the best fit with R<sup>2</sup> values equal to 0.97.

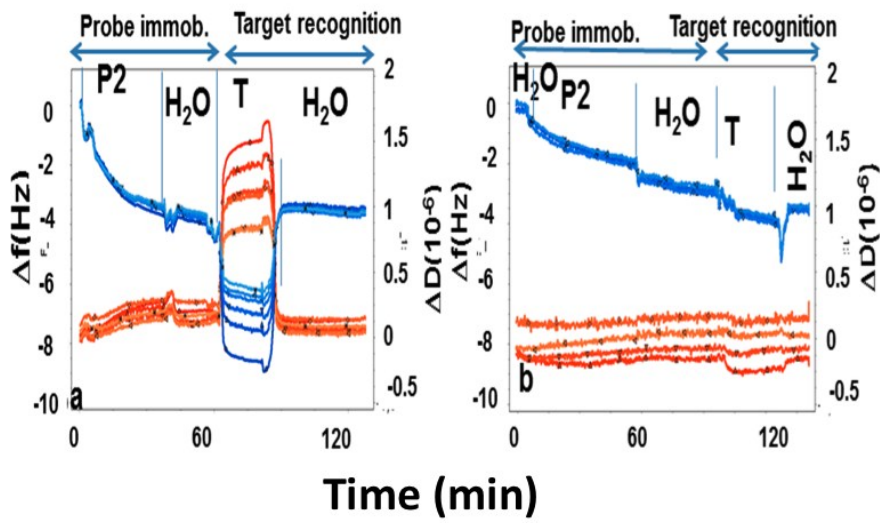

**Figure SI 3.** QCM-D frequency (left y-axis) and dissipation (right y-axis) curves versus time (x-axis) for the target recognition step (T-clone), where the probe ssDNA (P2) solution at concentration 7.7  $\mu$ M (a), 0.8  $\mu$ M (b) was exchanged with H<sub>2</sub>O before and after with the specific target consisting on HBV-clone (T) and then rinsed with H<sub>2</sub>O. For the P2-adsorbed surfaces, the best surface probe density T-clone recognition resulted the same than for P1ss-DNA species, i.e., about  $4.0 \times 10^{12}$  molecules/cm<sup>2</sup>, yielding a genome T-clone retained mass of 42 ng/cm<sup>2</sup>.

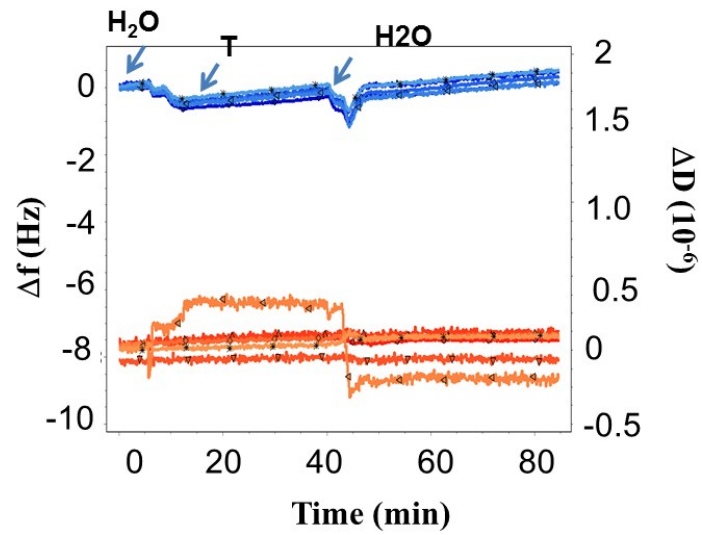

**Figure SI 4.** QCM-D  $\Delta f$  (left y axis) and  $\Delta D$  (right y axis) curves versus time (x axis) of the specific genomic target (T-clone) with gold surface. It is noteworthy to stress that specific T-clones were not adsorbed in any case, indicating that specific recognition events occurred.
